# Supplementary material
Source: ML conference proceedings conference paper supplement (https://proceedings.mlr.press/v164/mo22b.html)
Supplement: Supplementary file 2 [file mo22b-supp.zip]

Archive with 2 entries (1 files):
- o2oafford_supp/
- o2oafford_supp/supp.pdf
